# Supplementary material for: An improved Stöber method towards uniform and monodisperse Fe3O4@C nanospheres
Source: Royal Society of Chemistry journal article supplement (doi:10.1039/c3ta11249g), 2013-01-01
Supplement: c3ta11249g.pdf [file c3ta11249g.pdf]

Electronic Supplementary Information

## An improved Stöber method towards uniform and monodisperse Fe<sub>3</sub>O<sub>4</sub>@C nanospheres

Xue-Bin Zhang<sup>a</sup>, Hong-Wu Tong<sup>a</sup>, Shao-Min Liu<sup>a\*</sup>, Guo-Ping Yong<sup>a</sup> and Ya-Feng Guan<sup>a, b\*</sup>

<sup>a</sup>Department of Chemistry, University of Science and Technology of China, Hefei 230026, P. R. China. Fax&Tel: 0551-3492147; E-mail: [liusm@ustc.edu.cn](mailto:liusm@ustc.edu.cn); <sup>b</sup>Laboratory of Instrumentation and Analytical Chemistry, Key Lab of Separation Science for Analytical Chemistry of CAS, Dalian Institute of Chemical Physics, CAS, Dalian, Liaoning 116023, P.R. China. E-mail: [guanyafeng@dicp.ac.cn](mailto:guanyafeng@dicp.ac.cn); Fax: +86-0411-84379590, Tel: +86-0411-84379660.

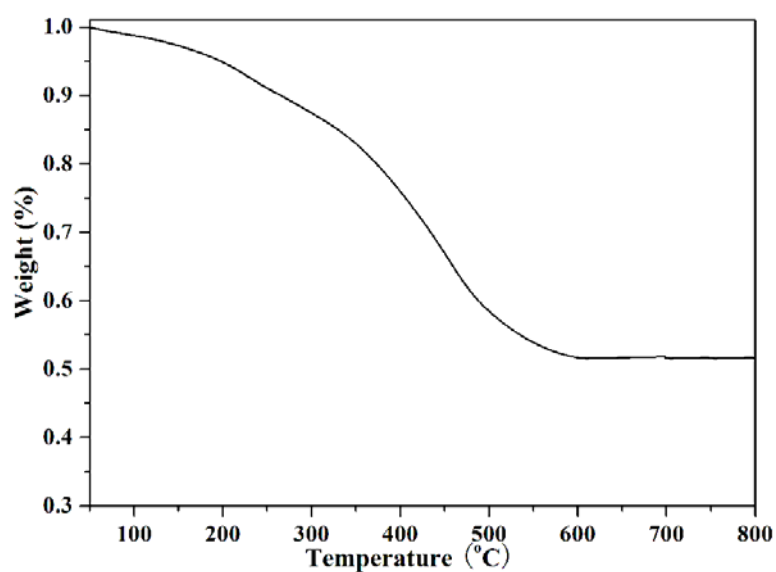

Figure S1. TGA curve of the Fe<sub>3</sub>O<sub>4</sub>@polymer sample.

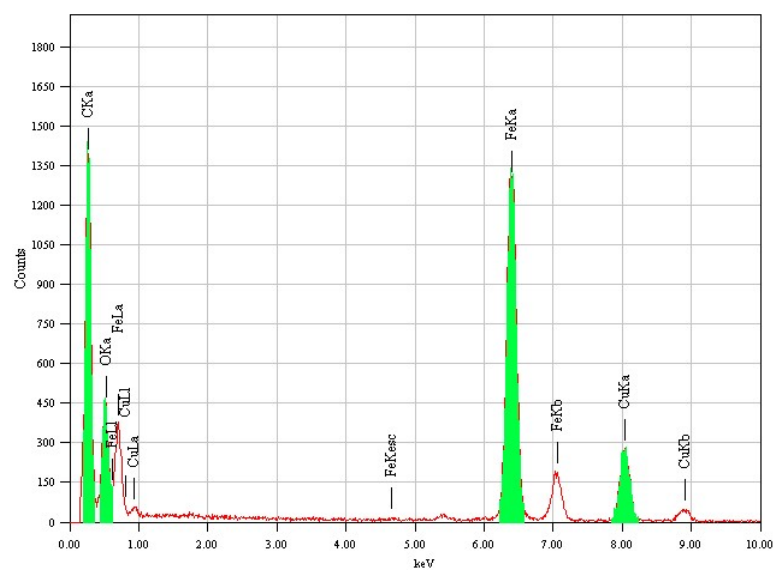

Figure S2. The EDS spectrum of Fe<sub>3</sub>O<sub>4</sub>@C sample.

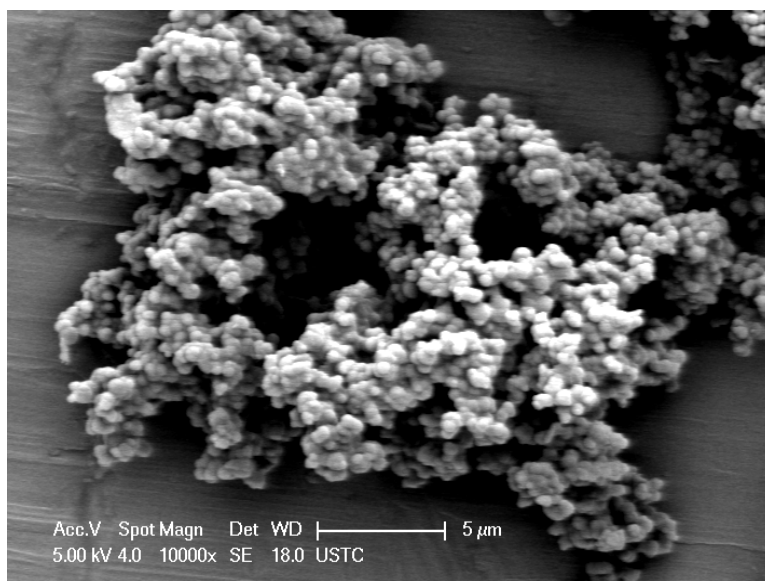

Figure S3. The SEM images of  $\text{Fe}_3\text{O}_4$ @polymer prepared without citrate groups outside  $\text{Fe}_3\text{O}_4$  surface.

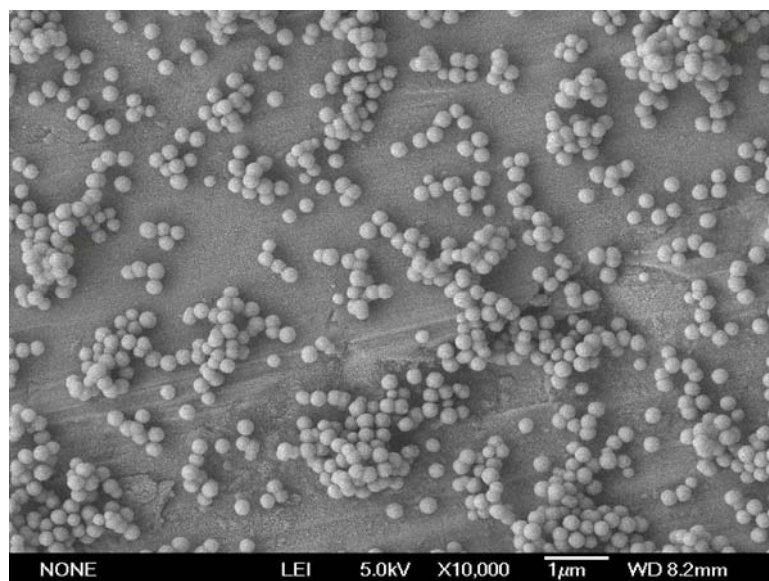

Figure S4. The SEM images of Fe<sub>3</sub>O<sub>4</sub>@polymer prepared in water ethanol mixed solution (water:ethanol=7:3).

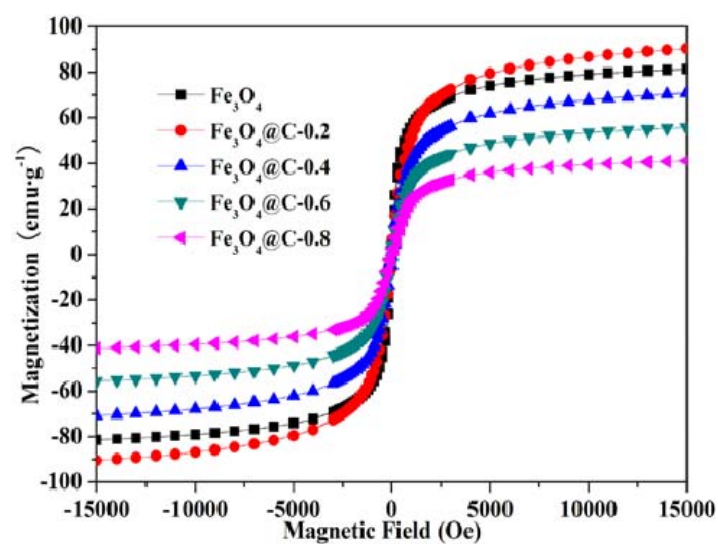

Figure S5 The room temperature hysteresis curves of  $\text{Fe}_3\text{O}_4$ , and  $\text{Fe}_3\text{O}_4@\text{C}$  prepared with different content of resorcinol and formaldehyde.

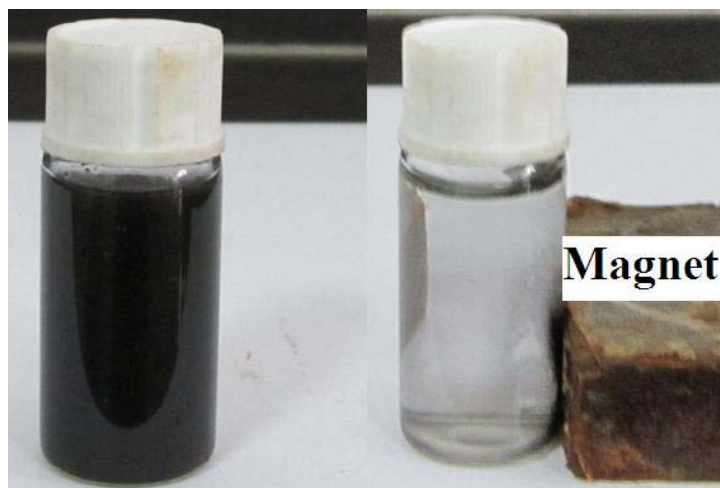

Figure S6 Photographs of  $\text{Fe}_3\text{O}_4@\text{C}$  magnetic separation phenomenon.
